# Supplementary material
Source: PubMed Central journal article supplement (PMC10906659)
Supplement: ehp13071.smcontents.508.pdf [file ehp13071.smcontents.508.pdf]

**Note to readers with disabilities:** *EHP* strives to ensure that all journal content is accessible to all readers. However, some figures and Supplemental Material published in *EHP* articles may not conform to [508 standards](#) due to the complexity of the information being presented. If you need assistance accessing journal content, please contact [ehp508@niehs.nih.gov](mailto:ehp508@niehs.nih.gov). Our staff will work with you to assess and meet your accessibility needs within 3 working days.

### **Supplemental Material**

#### **Exposure to Neighborhood Greenness and Hypertension Incidence in Adults: A Longitudinal Cohort Study in Taiwan**

Yi Qian Zeng, Ka Chun Chong, Ly-yun Chang, Xue Liang, Li-Hao Guo, Guanghui Dong, Tony Tam, and Xiang Qian Lao

#### **Table of Contents**

**Table S1.** Association between long-term exposure to neighborhood greenness and incident hypertension adjusted for potential mediators in Taiwanese adults ( $n=442,435$ ).

**Table S2.** Sensitivity analyses (1-6) of the association between long-term exposure to neighborhood greenness and incident hypertension in Taiwanese adults.

**Table S3.** Sensitivity analyses (7-12) of the association between long-term exposure to neighborhood greenness and incident hypertension in Taiwanese adults.

**Table S4.** Summary of temporal distribution of 2-year average Normalized Difference Vegetation Index (NDVI) values within a 500-m buffer for baseline visits from 125,537 participants in Taiwan.

**Table S5.** Summary of temporal distribution of 2-year average Normalized Difference Vegetation Index (NDVI) values within a 500-m buffer for 442,435 medical visits from 125,537 participants in Taiwan.

**Table S6.** Summary of the association of 2-year average Normalized Difference Vegetation Index (NDVI) values within a 500-m buffer with incident hypertension in Taiwanese adults.

**Figure S1.** Temporal distribution of 2-year average Normalized Difference Vegetation Index (NDVI) values within a 500-m buffer in Taiwan.

**Figure S2.** Concentration-response curves for the association of 2-year average Normalized Difference Vegetation Index (NDVI) values within a 500-m buffer with incident hypertension in Taiwanese adults.

**Figure S3.** Spearman correlation coefficients among greenness and covariates for 442,435 medical visits.
